# Supplementary material for: Transglycosylation Properties of a Novelα-1,4-Glucanotransferase fromBacteroides thetaiotaomicronand Its Application in Developing anα-Glucosidase-Specific Inhibitor
Source: Hindawi journal article supplement (doi:10.1155/2018/2981596), 2018-12-17
Supplement: f1 [file 2981596.f1.docx]

# SUPPLEMENTARY DATA

**
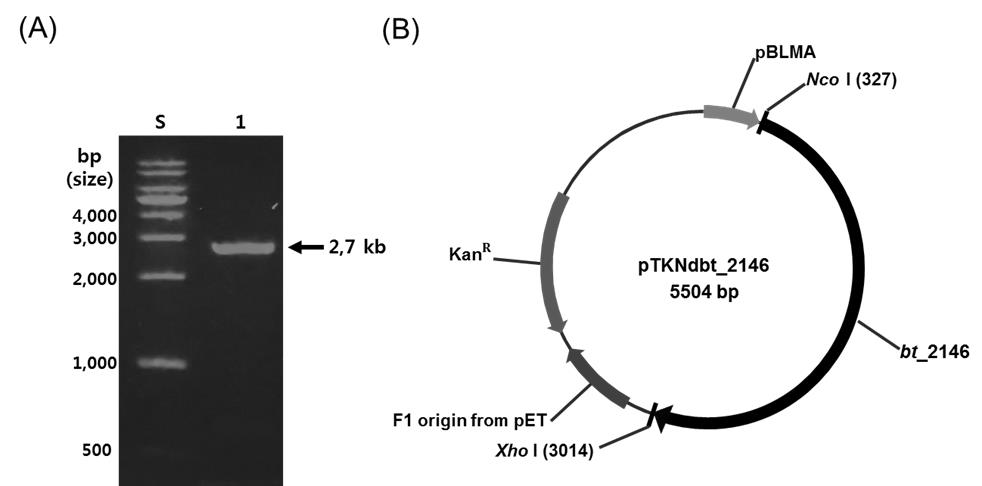
**

**Supplementary Data 1. Generation of the DNA construct for BtαGTase expression.** (A) The *bt*_*2146* gene was amplified by polymerase chain reaction (PCR). Lane S, DNA marker; lane 1, amplified BtαGTase gene. (B) The pKTNd_bt2146 construct was generated by ligating bt_2146 into the pTKNd vector.

**
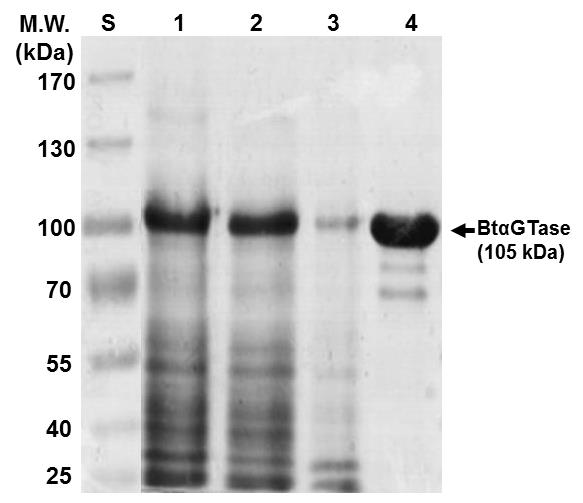
**

**Supplementary Data 2. sodium dodecyl sulfate polyacrylamide gel electrophoresis (SDS-PAGE) of BtαGTase at each purification step.** Lane S, protein size standards; lane 1, cellular protein from the crude extract; lane 2, soluble fraction; lane 3, insoluble fraction; and lane 4, purified BtαGTase.

**(a)**

**
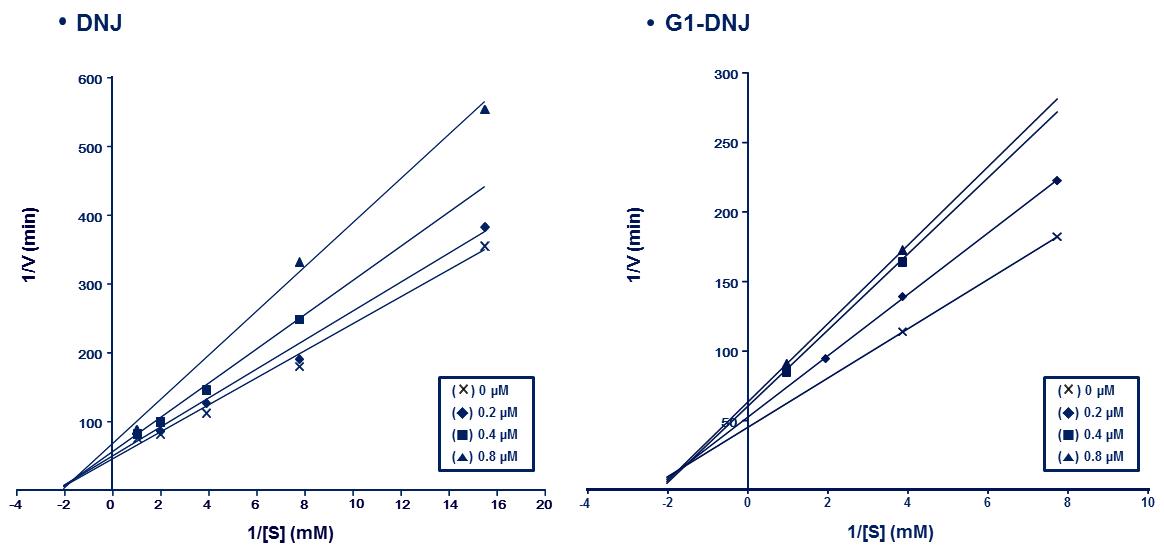
**

**(b)**

**
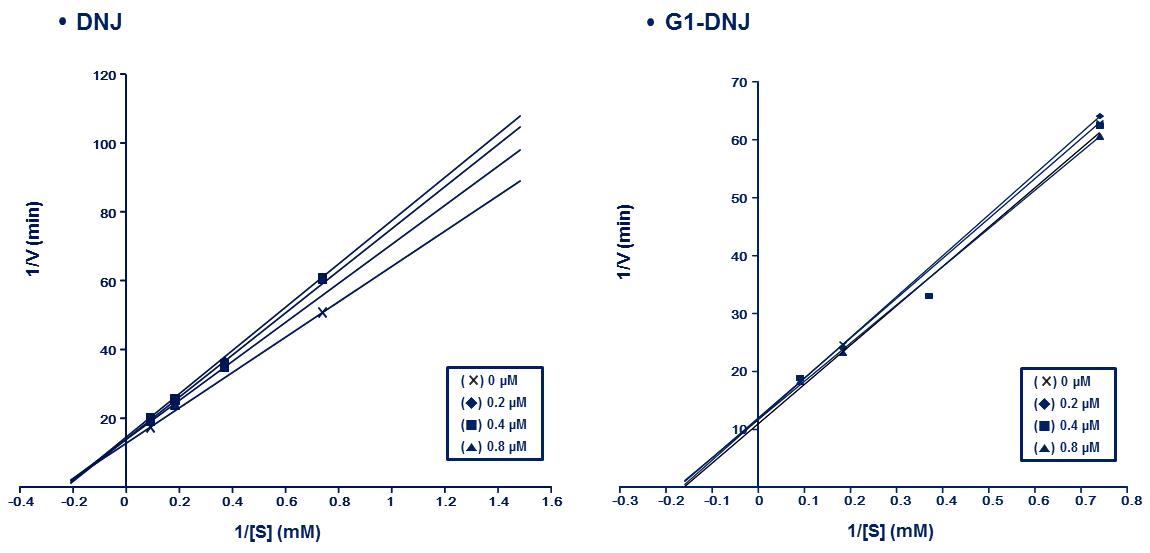
**

**Supplementary Data 3**. **Lineweaver-Burk plots showing the inhibitory effects of DNJ and G1-DNJ on the α-glucosidase (a) and α-amylase (b) activity**.

**
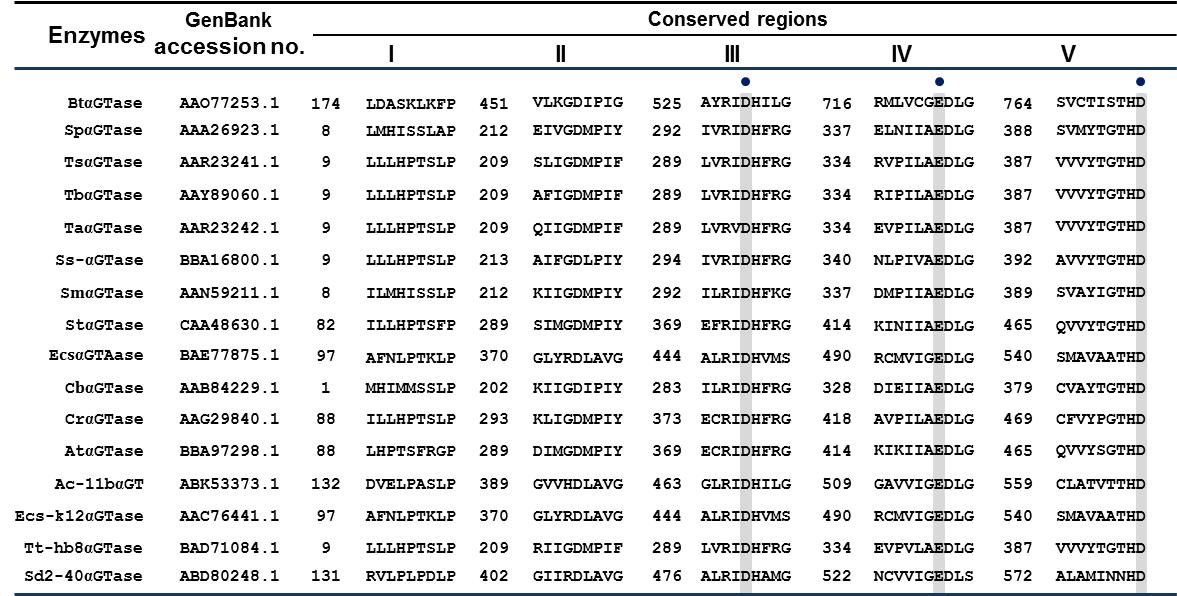
**

**Supplementary Data 4**. **Sequence alignment of conserved regions between BtαGTase and related glycoside hydrolase family GH77 members**. BtαGTase, α-glucanotransferase from *Bacteroides* *thetaiotaomicron*; SpαGTase, α-glucanotransferase from *Streptococcus pneumonia*; TsαGTase, α-glucanotransferase from *Thermus scotoductus*; TbαGTase, α-glucanotransferase from *Thermus brockianus*; TaαGTase, α-glucanotransferase from *Thermus aquaticus*; Ss-αGTase, α-glucanotransferase from *Synechocystis* sp.; SmαGTase, α-glucanotransferase from *Streptococcus mutans* UA159; StαGTase, α-glucanotransferase from *Solanum tuberosum*; CbαGTase, α-glucanotransferase from *Clostridium butyricum*; CrαGTase, α-glucanotransferase from *Chlamydomonas reinhardtii*; AtαGTase, α-glucanotransferase from *Arabidopsis thaliana*; Ac-11bαGTase, α-glucanotransferase from *Acidothermus cellulolyticus*; Ecs-k12αGTase, α-glucanotransferase from *Escherichia coli* str. K-12; Tt-hb8αGTase, α-glucosidase from *Thermus* *thermophilus*; and Sd2-40αGTase, α-glucanotransferase from *Saccharophagus* *degradans*. Closed circles at the conserved regions III, IV, and V represent the catalytic sites in family GH77 members.
